# Supplementary material for: Altgewordene Suchtkranke
Source: Springer Nature journal article supplement (doi:10.1007/s00391-018-1440-6), 2018-09-04
Supplement: MOESM1 [file 16098222]

**Tabelle e1**

**Körperliche Alkoholfolgekrankheiten**

**Kardiovaskuläres System**

ventrikuläre Dysfunktion, chronische Rhythmusstörungen, alkoholische Kardiomyopathie und koronare Herzkrankheit [e96 Pankuweit 2016)

Vorhofflimmern [e97-e99 Larsson et al. 2014, Liang et al. 2012, Pfeiffer et al. 2016]

Hypertonie [e100 Taylor et al. 2009]

Bei akutem Alkoholexzess Rhythmusstörungen („Holiday-Heart-Syndrom“), plötzlicher Herztod [e96 Pankuweit 2016)

**Gastrointestinaltrakt**

Akute hämorrhagische Gastritis [e101]

Fettleber, Fetteleberhepatitis (Steatohepatitis), alkoholbedingte Leberfibrose, irreversible Leberzirrhose, Pfortaderhochdruck mit weiteren Komplikationen (z. B. Ösophagusvarizen) [e102-e104]. Zusätzlich erhöhte Mortalität bei Adipositas [e105)

Leberzirrhose stellt eine präneoplastische Veränderung dar, erhöhtes Risiko für Leberzellkarzinom [e106]

Akute Pankreatitis, chronische Pankreatitis (Kontinuum); Pankreaskarzinom [e107-e108]. Erhöhtes Risiko für chronische Pankreatitis für Raucher [e109].

Diarrhoe [e110]

Maldigestion/Malabsorption, beeinträchtigte Aufnahme von fettlöslichen Vitaminen (A, D, E und K) und Vit B12, Folsäure sowie Thiamin (Vit B1) [e110]
Beeinträchtigung der Barrierefunktion der Darmschleimhaut [e111] und bakterielle Fehlbesiedlung mit Überwiegen gramnegativer fäkaler Keime, Folge: Aufnahme bakterieller Toxine mit großem pathogenen Potenzial und chronische Immunstimulation [e110]

**Urogenitalsystem**

Akutes Nierenversagen

Elektrolytstörungen [e112]

**Immunsystem**

Erhöhte Empfindlichkeit für bakterielle und virale Infektionen, aber auch für sterile Entzündungen [e113]; gehäuftes Auftreten von Pneumonien und Tuberkulose [e114].

Durch die alkoholbedingt beeinträchtigte Immunantwort deutlich schlechterer Verlauf nach Verbrennungstraumata, traumatisch bedingtem hämorrhagischem Schock sowie Schädel-Hirn-Traumata [e115].

**Blutbildung und Blutgerinnung**

Gestörte Hämatopoese, Folge: verschiedene Veränderungen der Erythrozyten [e116]

Verminderte Erythrozytopoese, Vermehrte Hämolyse, Mikro- oder Makroblutungen im Magen-Darm-Trakt, Folge: Anämie [e116]

Verminderte Thrombozytopoese, verminderte Produktion verschiedener Gerinnungsfaktoren, Folge: erhöhtes Blutungsrisiko [e117]

Bei akutem Alkoholexzess gesteigerte Blutgerinnung mit erhöhtem Risiko für Thrombembolien (Herzinfarkt, Schlaganfall) [e117]

**Stoffwechsel**

Erhöhtes Risiko für metabolisches Syndrom [e118-e121], Risiko für Typ-2-Diabetes gegenüber der Allgemeinbevölkerung verdoppelt [e122].

In fortgeschrittenen Stadien häufig Sarkopenie; nicht nur Folge von Mangelernährung und anderen sekundären Faktoren des Alkoholmissbrauchs, sondern auch Resultat des Ethanol-Abbaus im Muskelgewebe [e123].

**Bösartige Neubildungen**

Erhöhtes Risiko für verschiedene Krebsformen, darunter Brustkrebs, Kolonkarzinom, Leberkrebs sowie Karzinome von Mundhöhle, Larynx-Pharynx-Region und Ösophagus [e124-e127].

Hauptrisikofaktor für das Plattenepithelkarzinom, das über 90 % aller Ösophagustumore ausmacht, ist die Kombination von Alkohol und Rauchen [e128].

Durch zusätzliches Rauchen weitere deutliche Risikoerhöhung für kolorektale Karzinome [Parlesak & Franke 2011 Singer] und Larynxkarzinom [e126].

Bei hochprozentigen alkoholischen Getränken erhöhtes Risiko für Prostatakarzinom [e112].

**Neurologische Erkrankungen**

Erhöhtes Risiko für alle Formen von Schlaganfall [e129].

Erhöhtes Risiko für intrakraniellen Blutungen [e130].

Entzugskrampfanfälle, aber auch erhöhtes Risiko für nicht provozierte, spontane Krampfanfälle [e131].

Polyneuropathie [e130, e132]

Kleinhirnschädigung [e130, e132]

Kompressionssyndrome peripherer Nerven (durch Lagerungsschäden in intoxikiertem Zustand) [e132]

Chronische Muskelerkrankungen (Myositis) [e130, e132]

Thiaminmangelsyndrome: das sog. trockene beri-beri-Syndrom, Wernicke-Enzephalopathie, Marchiafava-Bignami-Syndrom [e130, e132]
